# Supplementary material for: A simple, fast and inexpensive approach to quantify low concentrations of iron in biodiesel by voltammetry after extraction induced by microemulsion breaking
Source: Royal Society of Chemistry journal article supplement (doi:10.1039/d4ay00342j), 2024-01-01
Supplement: d4ay00342j1.pdf [file d4ay00342j1.pdf]

**A simple, fast and inexpensive approach to quantify low concentrations of iron in biodiesel by voltammetry after extraction induced by microemulsion breaking**

**APPENDIX A – SUPPLEMENTARY DATA**

Cristian H. Krause<sup>a</sup>, Alexandre B. Schneider<sup>a,\*</sup>, Leandro Kolling<sup>a</sup>, Lauren T. T. Oliveira<sup>a</sup>, Márcia M. da Silva<sup>a</sup>

<sup>a</sup>Instituto de Química, Universidade Federal do Rio Grande do Sul, Av. Bento Gonçalves, 9500, C.P. 15003, 91501-970, Porto Alegre, RS, Brazil

\* Corresponding author: Tel +55 51 3308 7318

\* E-mail address: schneider.alexandre@ufrgs.br

**A.1. Instrumental conditions for Fe determination by using the comparative method**

| <b>Equipament</b>   | <b>High-Resolution Continuum Source Atomic Absorption Spectrometer</b> |
|---------------------|------------------------------------------------------------------------|
| <b>Model</b>        | contrAA 700                                                            |
| <b>Manufacturer</b> | AnalytikJena                                                           |
| <b>Mode</b>         | Graphite Furnace                                                       |
| <b>Wavelength</b>   | 231.096 nm                                                             |

**A.2. Optimized temperature program for Fe determination in biodiesel sample by using the HR-CS GF AAS.**

| <b>Temperature Program - Ni/Fe simultaneous determination</b> |              |                 |                   |               |                     |
|---------------------------------------------------------------|--------------|-----------------|-------------------|---------------|---------------------|
| <b>Step</b>                                                   | <b>Name</b>  | <b>Temp, °C</b> | <b>Ramp, °C/s</b> | <b>Hold,s</b> | <b>Purge, L/min</b> |
| <b>1</b>                                                      | Drying 1     | 80              | 6                 | 20            | 2,0                 |
| <b>2</b>                                                      | Drying 2     | 90              | 3                 | 20            | 2,0                 |
| <b>3</b>                                                      | Drying 3     | 110             | 5                 | 10            | 2,0                 |
| <b>4</b>                                                      | Pyrolysis 1  | 350             | 50                | 20            | 2,0                 |
| <b>5</b>                                                      | Pyrolysis 2  | 1050            | 300               | 10            | 2,0                 |
| <b>6</b>                                                      | Gas Adaption | 1050            | 0                 | 5             | 0,0                 |
| <b>7</b>                                                      | Atomize      | 2400            | 1200              | 7             | 0,0                 |
| <b>8</b>                                                      | Clean        | 2600            | 500               | 4             | 2,0                 |
